# Supplementary material for: Highly efficient gas molecule-tunable few-layer GaSe phototransistors
Source: Royal Society of Chemistry journal article supplement (doi:10.1039/c5tc03459k), 2015-11-26
Supplement: c5tc03459k1.pdf [file c5tc03459k1.pdf]

## Supporting Information

### Highly efficient gas molecule-tunable few-layer GaSe phototransistors

Shengxue Yang<sup>1</sup>, Qu Yue<sup>2</sup>, Hui Cai<sup>3</sup>, Kedi Wu<sup>3</sup>, Chengbao Jiang<sup>1,\*</sup>, Sefaattin Tongay<sup>3,\*</sup>

<sup>1</sup>School of Materials Science and Engineering, Beihang University, Beijing 100191,  
PR China

<sup>2</sup>College of Science, National University of Defense Technology, Changsha 410073,  
China

<sup>3</sup>School for Engineering of Matter, Transport and Energy, Arizona State University,  
Tempe, AZ 85287, United States

#### Corresponding Author

\*Correspondence and requests for materials should be addressed to C.J (email: [jiangcb@buaa.edu.cn](mailto:jiangcb@buaa.edu.cn)) and S.T. (email: [sefaattin.tongay@asu.edu](mailto:sefaattin.tongay@asu.edu)).

## Experimental section

**Mechanical Exfoliation of GaSe:** GaSe crystals were grown by modified Bridgman technique. Few-layer GaSe nanosheets were exfoliated from bulk GaSe crystals and then deposited onto the freshly cleaned 300 nm SiO<sub>2</sub>/Si substrates using the scotch tape-based micromechanical exfoliation method. We observed few-layer GaSe nanosheets through an optical microscope (OLYMPUS OLS40-SU).

**Thermal Annealing:** The samples were heated to 300 °C in a 25 °C/min rate and the temperature was held at 300 °C for half an hour in vacuum. After annealing, the furnace was cooled down to room temperature and the samples were taken out of the furnace.

**Phototransistors were fabricated as follows:** Metal electrodes were fabricated using UV photolithography (SUSS MA6/BA6) followed by electron beam evaporation (EB700-I) of 8 nm Cr and 50 nm gold. Electrical characterization for the phototransistors was measured using a semiconductor parameter analyzer (Agilent B2902A) and shielded probe station.

**Raman Spectroscopy:** Analysis of the few-layer GaSe nanosheet by Raman spectroscopy was carried out on a laser Raman spectrometer (Renishaw inVia plus) with the excitation line of 514 nm used in a backscattering configuration. Raman spectra were collected using a 100× objective and recorded with 1800 lines/mm grating providing the spectral resolution of  $\sim 1 \text{ cm}^{-1}$ . The spectra were entirely recorded at low power levels  $P = 0.5 \text{ mW}$  to avoid laser-induced heating and ablation of the samples. And the photoluminescence (PL) measurements have been carried out with the same Renishaw inVia plus setup.

**EDX analysis:** Energy dispersive X-ray spectroscopy (EDX) was utilized for the estimation of the composition of GaSe and it was equipped on the SEM instrument (FEI NOVA NanoSEM430).

**Density Functional Theory Calculations:** Our first-principles spin-polarized calculations are performed based on density-functional theory (DFT) by using the Vienna *ab initio* simulation package (VASP)<sup>1</sup>. A 3×3 supercell of GaSe monolayer is

used to simulate the adsorption of O<sub>2</sub> molecule on it. The exchange-correction interaction is treated by the van der Waals density functional (vdW-DF)<sup>2</sup> to describe this adsorbed system. After energy convergence analysis, an energy cutoff of 450 eV for the plane-wave basis set and a Monkhorst-Pack grid of 6×6×1 for the Brillouin zone integration are employed. In order to avoid the interaction between two adjacent monolayers, a vacuum layer larger than 15 Å is added. The geometric structure is fully relaxed by using conjugate gradient method until the Hellmann-Feynman force on each atom is smaller than 0.02 eV/Å. The charge transfer between GaSe monolayer and O<sub>2</sub> molecule is obtained based on the Bader analysis<sup>3</sup>.

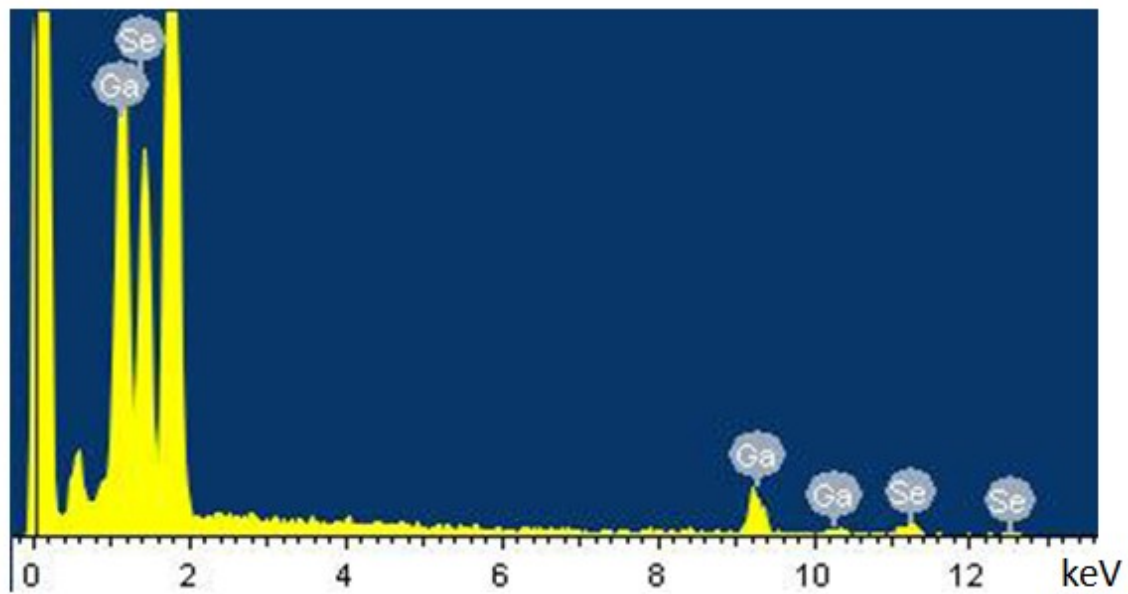

Figure S1. EDX pattern of GaSe nanosheet.

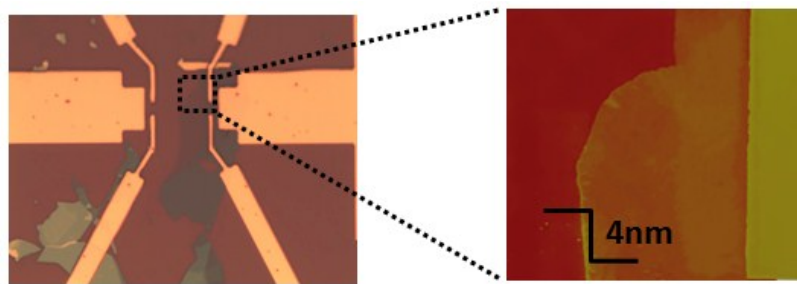

Figure S2. The AFM image of few-layer GaSe nanosheet.

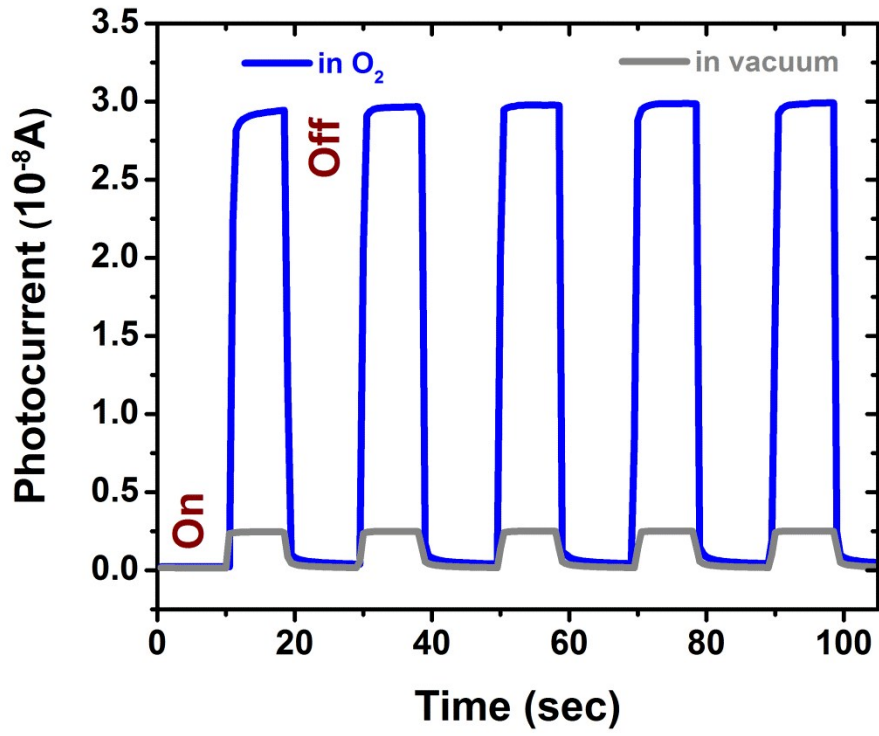

Figure S3. I-t curves of the annealed device in O<sub>2</sub> gas environment (blue) and in vacuum (gray) illuminated by UV light switching on/off.

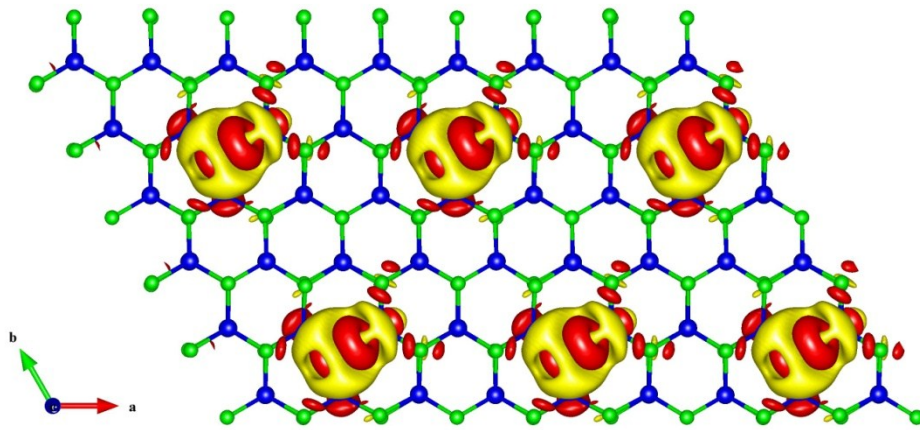

Figure S4. Charge density difference plots for GaSe with defect (top view). The iso-surface value with defect is  $1 \times 10^{-3} \text{ e}/\text{\AA}^3$ . Red and yellow distributions correspond to charge accumulation and depletion, respectively.

Table 1 Comparison of the parameters of our device to the reported 2D material based photodetectors.

| Photodetectors               | $R_{\lambda}$ ( $\text{AW}^{-1}$ ) | EQE (%) | Response time |
|------------------------------|------------------------------------|---------|---------------|
| Graphene <sup>[4]</sup>      | $1.0 \times 10^{-3}$               | 6-16    |               |
| Graphene <sup>[5]</sup>      | $6.1 \times 10^{-3}$               | 1500    |               |
| GaS Nanosheet <sup>[6]</sup> | 4.2                                | 2050    | ~30 ms        |
| Our phototransistor          | 18.75                              | 9153    | ~0.21s        |

## Reference

1. Kresse, G.; Hafner, J. Phys. Rev. B 1993, 47, 558–561; Kresse, G.; Furthmüller, J. Phys. Rev. B 1996, 54, 11169–11186.
2. Klimes, J.; Bowler, D. R.; Michaelides, A. Phys. Rev. B 2011, 83, 195131.
3. Henkelman, G.; Arnaldsson, A.; Jonsson, H. Comput. Mater. Sci. 2006, 36, 354.
4. Xia, F.; Mueller, T.; Lin, Y.; Valdes-Garcia, A.; Avouris, P. Nature Nanotech. 2009, 4, 839.
5. Liu, Y.; Cheng, R.; Liao, L.; Zhou, H.; Bai, J.; Liu, G.; Liu, L.; Huang, Y.; Duan, X. Nat. Commun. 2011, 2, 579.
6. Hu, P.; Wen, Z.; Wang, L.; Tan, P.; Xiao, K. ACS Nano 2012, 6, 5988.
